# Supplementary material for: Genomic profiling of a metastatic anaplastic melanocytic neuroectodermal tumor arising from a mature thymic teratoma as part of a mediastinal germ cell tumor
Source: PubMed Central journal article supplement — Cold Spring Harb Mol Case Stud. 2023 Apr;9(2):a006257. doi: 10.1101/mcs.a006257 (PMC10240838; doi:10.1101/mcs.a006257), 2023-04
Supplement: supp_mcs.a006257_Supplemental_Material.pdf [file supp_mcs.a006257_Supplemental_Material.pdf]

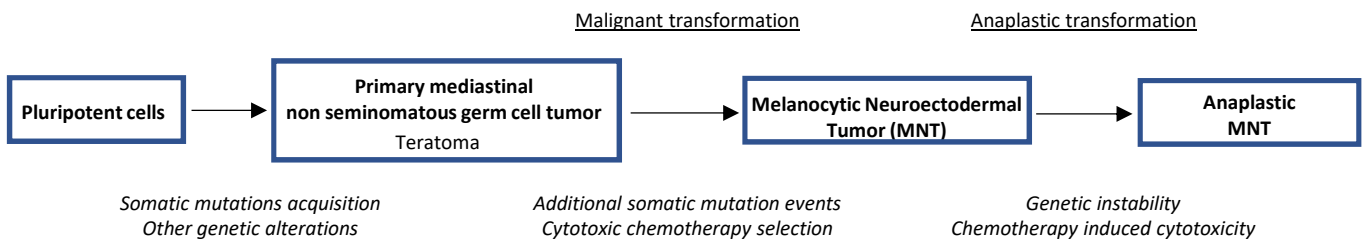

### Supplemental Figure 1. Hypothetical tumoral evolution

Non-seminomatous germ cell tumors could originate from pluripotent cells that have acquired various genetic alterations and somatic mutations. These tumors may contain a teratomatous component which is selected by chemotherapy. In our study, the teratomatous component is at the origin of the malignant transformation called MNT. This MNT component then underwent an anaplastic transformation potentially due to genetic instability and chemotherapy induced cytotoxicity







Table S2

| Gene      | Weighted score | Gene       | Weighted score | Gene     | Weighted score | Gene           | Weighted score | Gene     | Weighted score | Gene      | Weighted score | Gene | Weighted score |
|-----------|----------------|------------|----------------|----------|----------------|----------------|----------------|----------|----------------|-----------|----------------|------|----------------|
| PIK3R6    | 1              | VP551      | 1              | IGLV3-10 | 1              | IL1RAPL2       | 1              | SOBP     | 1              | SNRK      | 2              |      |                |
| GGT7      | 1              | MRC2       | 1              | FRG1     | 1              | IRGC           | 1              | ABCG2    | 1              | OSBP1     | 2              |      |                |
| TRRAP     | 1              | MEGF10     | 1              | DIRC2    | 1              | DOC2A          | 1              | TMEM260  | 1              | SENP1     | 2              |      |                |
| FZD4      | 1              | CNOT2      | 1              | FBXO24   | 1              | TMEM256-PLSCR3 | 1              | AFF1     | 1              | MMRN2     | 2              |      |                |
| TKTL2     | 1              | KLHL21     | 1              | PMS1     | 1              | VCP            | 1              | PKD1L2   | 1              | CILP2     | 2              |      |                |
| OR7C1     | 1              | ZDHHC3     | 1              | TRNP1    | 1              | SLC22A20       | 1              | PPP1R12B | 1              | POLA1     | 2              |      |                |
| PKP3      | 1              | TNFRSF10B  | 1              | C4BPA    | 1              | FAM181A        | 1              | DDX6     | 1              | GPR160    | 2              |      |                |
| PLCH2     | 1              | DST        | 1              | COL5A3   | 1              | NHLRC2         | 1              | CCDC37   | 1              | PRCD      | 2              |      |                |
| NUP50     | 1              | NDUFC2     | 1              | TTN      | 1              | COL2A1         | 1              | PWWP2B   | 1              | KLF18     | 2              |      |                |
| TREM1     | 1              | PTP4A1     | 1              | SERPINE1 | 1              | ARHGEF11       | 1              | GPRC5B   | 1              | SMARCAL1  | 2              |      |                |
| ZBTB7A    | 1              | NMUR2      | 1              | WDR18    | 1              | RP11-998D10.1  | 1              | GALNT5   | 1              | LAMAS     | 2              |      |                |
| ZSWIM6    | 1              | PIK3R6     | 1              | RLIM     | 1              | E4F1           | 1              | HECW1    | 1              | CBFA2T2   | 2              |      |                |
| KCNMB3    | 1              | BSN        | 1              | CYFIP1   | 1              | CACNA1F        | 1              | GPR35    | 1              | SEC24D    | 2              |      |                |
| PER3      | 1              | HS6ST1     | 1              | PASK     | 1              | OS9            | 1              | FLYWCH1  | 1              | RYK       | 2              |      |                |
| MSS51     | 1              | EPAS1      | 1              | APLP2    | 1              | CAMKK2         | 1              | ATG4D    | 1              | NCOR1     | 2              |      |                |
| SNX19     | 1              | KIAA0556   | 1              | EVA1A    | 1              | OBSCN          | 1              | CNTD2    | 1              | NAIP      | 2              |      |                |
| SLC39A14  | 1              | ITH4       | 1              | NCLN     | 1              | SIX4           | 1              | NODAL    | 1              | XYLT1     | 2              |      |                |
| MBD6      | 1              | CAMTA1     | 1              | SLC39A14 | 1              | TMEM30B        | 1              | HTT      | 1              | C2CD2     | 2              |      |                |
| TMEM132B  | 1              | FBF1       | 1              | DCDC2    | 1              | TMEM184A       | 1              | NOCL2    | 1              | SCN11A    | 2              |      |                |
| FLNA      | 1              | PPP3CB     | 1              | NUP93    | 1              | DAAM2          | 1              | TMEM125  | 1              | TUBB4B    | 2              |      |                |
| ANO1      | 1              | UVSSA      | 1              | TMEM51   | 1              | PRR12          | 1              | UNKL     | 1              | MYO6      | 2              |      |                |
| DBNDD1    | 1              | COLGA1     | 1              | ALPI     | 1              | HECW1          | 1              | CREB3L1  | 1              | FAM127A   | 2              |      |                |
| GBGT1     | 1              | ACAD10     | 1              | TLDC1    | 1              | ADAMTSL4       | 1              | TOMM70A  | 1              | SEPP1     | 2              |      |                |
| SERPINA10 | 1              | GPR137B    | 1              | TIGIT    | 1              | VWA8           | 1              | LOXHD1   | 1              | CRY1      | 2              |      |                |
| PTPN21    | 1              | WHSC1      | 1              | ZNF646   | 1              | EFCAB3         | 1              | FAP      | 1              | INTS3     | 2              |      |                |
| SPTAN1    | 1              | KRTAP9-4   | 1              | STAB1    | 1              | AMPD3          | 1              | B4GALNT3 | 1              | LMTK2     | 2              |      |                |
| BCKDHA    | 1              | ZNF786     | 1              | TUBGCP2  | 1              | SLC5A10        | 1              | TTYH2    | 1              | ODC1      | 2              |      |                |
| SUZ12     | 1              | RASIP1     | 1              | SLC44A4  | 1              | ITGAM          | 1              | SMG1     | 1              | NFKBID    | 2              |      |                |
| CDC42BPA  | 1              | CREM       | 1              | OGFOD1   | 1              | MARK2          | 1              | PRDM15   | 1              | ARHGEF10L | 2              |      |                |
| HK3       | 1              | CREBBP     | 1              | CECR6    | 1              | NOP56          | 1              | BTBD16   | 2              | DYSF      | 2              |      |                |
| MED22     | 1              | TBC1D17    | 1              | CEP170B  | 1              | KHSRP          | 1              | LAMA1    | 2              | SETD3     | 2              |      |                |
| TRIM7     | 1              | GRB2       | 1              | XPNPEP1  | 1              | FKBP9          | 1              | SETD2    | 2              | CACNB1    | 2              |      |                |
| PIEZO2    | 1              | ZNF710     | 1              | HIP1R    | 1              | SCT            | 1              | CEPT1    | 2              | ARHGAP1   | 2              |      |                |
| AMER3     | 1              | MTF1       | 1              | ZNF669   | 1              | CESSA          | 1              | ZNF74    | 2              | LRRC48    | 2              |      |                |
| GREB1L    | 1              | ZNF208     | 1              | ALLC     | 1              | NLR3           | 1              | ETNK1    | 2              | PPP6R3    | 2              |      |                |
| KBTBD6    | 1              | ABCD4      | 1              | FGF22    | 1              | ARID3C         | 1              | HOXB1    | 2              | SLC13A1   | 2              |      |                |
| HELZ2     | 1              | CFD        | 1              | BAZZA    | 1              | C6orf118       | 1              | AATK     | 2              | ZNF768    | 2              |      |                |
| TMEM248   | 1              | STEAP3     | 1              | NOS1     | 1              | RABEP1         | 1              | NBEAL2   | 2              | STK10     | 2              |      |                |
| AVIL      | 1              | LAMAS      | 1              | PIK3C2G  | 1              | DFNB31         | 1              | HECTD4   | 2              | GTF3C1    | 2              |      |                |
| ARAP3     | 1              | WNT4       | 1              | RNF217   | 1              | TMEM143        | 1              | OR4X2    | 2              | MAGEE1    | 2              |      |                |
| HRC       | 1              | CRAMP1L    | 1              | LRRMT1   | 1              | PLBD2          | 1              | GRIN2B   | 2              | ZZEF1     | 2              |      |                |
| NME6      | 1              | KSR1       | 1              | FLVCR1   | 1              | CSRNP1         | 1              | NCKAP5L  | 2              | GRK5      | 2              |      |                |
| PTCHD3    | 1              | C9orf3     | 1              | COL9A2   | 1              | SARDH          | 1              | CACTIN   | 2              | MINPP1    | 2              |      |                |
| PPP1R13L  | 1              | TRIM7      | 1              | ITPKB    | 1              | UGT2B11        | 1              | MYRIP    | 2              | TMEM117   | 2              |      |                |
| PASK      | 1              | CASB       | 1              | OSBPL2   | 1              | PPL            | 1              | PRICKLE2 | 2              | SLC45A3   | 2              |      |                |
| TSC2D2    | 1              | COL5A3     | 1              | GTPBP3   | 1              | ALPK2          | 1              | SEC13    | 2              | INO80C    | 2              |      |                |
| Gene      | Weighted score | Gene       | Weighted score | Gene     | Weighted score | Gene           | Weighted score | Gene     | Weighted score | Gene      | Weighted score | Gene | Weighted score |
| DOCK5     | 2              | ADCK1      | 2              | OR2F2    | 2              | GOLGA6L2       | 3              | FLOT1    | 3              |           |                |      |                |
| HIC2      | 2              | WRAP73     | 2              | PRB2     | 2              | GLIS1          | 3              | RNF151   | 3              |           |                |      |                |
| PLA2R1    | 2              | SLC2A2     | 2              | HDAC8    | 2              | IGLV2-18       | 3              | HTRA     | 3              |           |                |      |                |
| CRTAC1    | 2              | ACAN       | 2              | CTSF     | 2              | USP24          | 3              | ZFYVE26  | 3              |           |                |      |                |
| CACTIN    | 2              | TRIM47     | 2              | KLHL22   | 2              | PPP1R16A       | 3              | SUPT6H   | 3              |           |                |      |                |
| RSBN1L    | 2              | TCHH       | 2              | CCDC94   | 2              | SLC9B1         | 3              | CAD      | 3              |           |                |      |                |
| CDIP1     | 2              | UNC5A      | 2              | LRRC41   | 2              | ZNF514         | 3              | CCDC33   | 3              |           |                |      |                |
| TCERG1    | 2              | SSX1       | 2              | SCNN1B   | 2              | CDHR5          | 3              | EML5     | 3              |           |                |      |                |
| DRD4      | 2              | PLEC       | 2              | TADA3    | 2              | CHD2           | 3              | CYP11B1  | 3              |           |                |      |                |
| SPATA21   | 2              | GPR112     | 2              | XAB2     | 2              | KDR            | 3              | ERCC6L2  | 3              |           |                |      |                |
| KIAA1522  | 2              | POLA1      | 2              | MUC19    | 2              | LATS1          | 3              | POTEE    | 3              |           |                |      |                |
| TMBIM1    | 2              | DLEC1      | 2              | MAP3K4   | 2              | FAM124A        | 3              | BDP1     | 3              |           |                |      |                |
| FLT4      | 2              | GPR50      | 2              | ACSM2A   | 2              | NES            | 3              | NFKB1    | 3              |           |                |      |                |
| DNAH17    | 2              | UBE2QL1    | 2              | RYR1     | 2              | CD244          | 3              | CAMSAP1  | 3              |           |                |      |                |
| SCML2     | 2              | CD9        | 2              | C19orf70 | 2              | BNC2           | 3              | CLDN7    | 3              |           |                |      |                |
| BRINP1    | 2              | AL356356.1 | 2              | RAVER1   | 2              | CREBBP         | 3              | OTOP1    | 3              |           |                |      |                |
| STAB1     | 2              | ASS1       | 2              | RORC     | 2              | WASF3          | 3              | FAM96A   | 3              |           |                |      |                |
| ADSSL1    | 2              | GPCPD1     | 2              | MIR4426  | 2              | PLG            | 3              | MUC4     | 3              |           |                |      |                |
| MCFD2     | 2              | VSIG10L2   | 2              | IDH2     | 2              | MPC1           | 3              | TMEM82   | 3              |           |                |      |                |
| SNL1      | 2              | NBL1       | 2              | TAPBP1   | 2              | SLFN12L        | 3              | MBD6     | 3              |           |                |      |                |
| SYNE4     | 2              | SH3RF2     | 2              | IKZF1    | 2              | DNMT3B         | 3              | UBN2     | 3              |           |                |      |                |
| UBXN11    | 2              | TATDN3     | 2              | EIF3A    | 2              | IGSF11         | 3              | BSN      | 3              |           |                |      |                |
| CACNA1G   | 2              | ADAMTSL1   | 2              | ANXA6    | 2              | SPAST          | 3              | RARRS1   | 4              |           |                |      |                |
| IFI35     | 2              | TMEM235    | 2              | VAMP2    | 2              | ANTXR2         | 3              | CCDC149  | 4              |           |                |      |                |
| SCN10A    | 2              | PLEKHG3    | 2              | MBD6     | 2              | TEX36          | 3              | PAK1IP1  | 4              |           |                |      |                |
| MVD       | 2              | SLC12A9    | 2              | PAPOLG   | 2              | NIPAL3         | 3              | HNRNPA1  | 4              |           |                |      |                |
| SLX4      | 2              | UCKL1      | 2              | RASGRP2  | 2              | LOC100130705   | 3              | SEPP1    | 5              |           |                |      |                |
| TAF1L     | 2              | CCDC153    | 2              | IQCA1    | 2              | MUC16          | 3              | OR10G9   | 5              |           |                |      |                |
| DUS3L     | 2              | MIPOL1     | 2              | BAIAP2   | 2              | CACNA1F        | 3              | HDGFRP2  | 6              |           |                |      |                |
| TOPAZ1    | 2              | C22orf43   | 2              | DDX23    | 2              | ZNF181         | 3              | TP53     | 6              |           |                |      |                |
| HMCN1     | 2              | AGRP       | 2              | NWD1     | 2              | ADCK3          | 3              | FAM47C   | 6              |           |                |      |                |
| PDE5A     | 2              | FCGR2A     | 2              | ASNS     | 2              | SPATA31C2      | 3              | KRAS     | 6              |           |                |      |                |
| PLEKHG3   | 2              | ZNF264     | 2              | POLR3D   | 2              | PABPC1         | 3              | ROCK2    | 6              |           |                |      |                |
| KLRC3     | 2              | CNGB1      | 2              | SAMD9    | 2              | RXR8           | 3              | POLQ     | 6              |           |                |      |                |
| GSDMA     | 2              | MORC3      | 2              | CIR1     | 2              | CPAMD8         | 3              |          |                |           |                |      |                |
| NAIP      | 2              | TRABD2A    | 2              | SLC25A13 | 2              | FAM186A        | 3              |          |                |           |                |      |                |
| ABCA3     | 2              | ADCY10     | 2              | TRIM45   | 2              | GPRIN3         | 3              |          |                |           |                |      |                |
| DGKD      | 2              | HDHD1      | 2              | WDR37    | 2              | FAT3           | 3              |          |                |           |                |      |                |
| ANKRD17   | 2              | MUC19      | 2              | LPCAT2   | 2              | FFAR2          | 3              |          |                |           |                |      |                |
| SCRIB     | 2              | REXO4      | 2              | ZNF160   | 2              | PIK3CG         | 3              |          |                |           |                |      |                |
| OPLAH     | 2              | PLA2G5     | 2              | DMAP1    | 2              | CDHR1          | 3              |          |                |           |                |      |                |
| CELSR2    | 2              | TDRD7      | 2              | FARS2    | 2              | LARP1          | 3              |          |                |           |                |      |                |
| MEGF6     | 2              | RWDD2A     | 2              | NFKBID   | 2              | ERBB4          | 3              |          |                |           |                |      |                |
| PTPN23    | 2              | WNK1       | 2              | SFXN3    | 2              | PRSS3          | 3              |          |                |           |                |      |                |
| SLC8A1    | 2              | CDV3       | 2              | PDE6B    | 2              | CCDC33         | 3              |          |                |           |                |      |                |
| RCBTB1    | 2              | KMT2B      | 2              | GIGYF2   | 3              | ZBTB14         | 3              |          |                |           |                |      |                |
